# Supplementary material for: Sex-Specific Effects of Acute Ethanol Exposure on Locomotory Activity and Exploratory Behavior in Adult Zebrafish (Danio rerio)
Source: Front Pharmacol. 2022 Jun 2;13:853936. doi: 10.3389/fphar.2022.853936 (PMC9201571; doi:10.3389/fphar.2022.853936)
Supplement: Supplementary file 2 [file DataSheet1.XLSX]

## Sheet: data
Trial	ID_nr	Sex	EtOH_dose	Group	Total_act	Arena_dx	Arena_v	Arena_freq	Arena_dur	Arena_durperc	Arena_lat	DCR_freq	DCR_freqperc	DCR_dur	DCR_durperc	DCR_durfreq	DCR_lat	START_freq	START_freqperc	START_dur	START_durperc	START_durfreq	START_lat	CORR1_freq	CORR1_freqperc	CORR1_dur	CORR1_durperc	CORR1_durfreq	CORR1_lat	CORN_freq	CORN_freqperc	CORN_dur	CORN_durperc	CORN_durfreq	CORN_lat	CORR2_freq	CORR2_freqperc	CORR2_dur	CORR2_durperc	CORR2_durfreq	CORR2_lat	RAMP1_freq	RAMP1_freqperc	RAMP1_dur	RAMP1_durperc	RAMP1_durfreq	RAMP1_lat	RAMP2_freq	RAMP2_freqperc
Trial 122	83	M	0%	M_0%	621	6650.48	3.69479	1	1800	100	0	217	34.9436392914654	674.84	37.4911111111111	3.10986	258.6	49	7.89049919484702	281.92	15.6622222222222	5.75347	0	148	23.8325281803543	125.8	6.98888888888889	0.85	263.16	35	5.63607085346216	406.56	22.5866666666667	11.616	726.16	16	2.57648953301127	38.44	2.13555555555556	2.4025	733.48	5	0.805152979066023	19.76	1.09777777777778	3.952	736.52	2	0.322061191626409
Trial 123	84	M	1%	M_1%	1339	14526.1	8.07023	1	1800	100	0	278	20.7617625093353	543.72	30.2066666666667	1.95583	9.24	238	17.7744585511576	203.76	11.32	0.856134	7.12	67	5.00373412994772	60.44	3.35777777777778	0.90209	5.12	31	2.31516056758775	57.56	3.19777777777778	1.85677	3.96	25	1.86706497386109	44.36	2.46444444444444	1.7744	1.44	39	2.9126213592233	74.8	4.15555555555556	1.91795	218.56	33	2.46452576549664
Trial 124	85	M	2%	M_2%	578	8128.27	4.51581	1	1800	100	0	59	10.2076124567474	1210.56	67.2533333333333	20.518	2.6	145	25.0865051903114	128.04	7.11333333333333	0.883034	0	0	0	0	0	0	1800	0	0	0	0	0	1800	0	0	0	0	0	1800	0	0	0	0	0	1800	0	0
Trial 125	86	M	0%	M_0%	950	12955	7.19739	1	1800	100	0	120	12.6315789473684	324.88	18.0488888888889	2.70733	0.2	86	9.05263157894737	104.4	5.8	1.21395	1.64	57	6	83.76	4.65333333333333	1.46947	303	31	3.26315789473684	68.68	3.81555555555556	2.21548	304	14	1.47368421052632	55.8	3.1	3.98571	305.24	97	10.2105263157895	384.84	21.38	3.96742	4.72	114	12
Trial 126	87	M	1%	M_1%	324	7079.05	3.93289	1	1800	100	0	8	2.46913580246914	7.4	0.411111111111111	0.925	1.48	27	8.33333333333333	15.2	0.844444444444444	0.562963	23.72	3	0.925925925925926	3.2	0.177777777777778	1.06667	3.88	1	0.308641975308642	1.04	0.0577777777777778	1.04	6.12	1	0.308641975308642	1.6	0.0888888888888889	1.6	7.16	25	7.71604938271605	196.84	10.9355555555556	7.8736	9.32	21	6.48148148148148
Trial 127	88	M	2%	M_2%	383	7015.02	3.89888	1	1799.4	99.9666666666667	0	190	49.6083550913838	1525.24	84.7638101589419	8.02758	0.72	6	1.56657963446475	2.76	0.153384461487162	0.46	187.64	35	9.13838120104439	39.28	2.18294987217962	1.12229	222.88	12	3.1331592689295	12.08	0.67133488940758	1.00667	241.04	11	2.87206266318538	12.4	0.689118595087251	1.12727	243.24	10	2.61096605744125	9.68	0.537957096810048	0.968	244.52	5	1.30548302872063
Trial 128	89	M	0%	M_0%	529	7549.68	4.19436	1	1800	100	0	47	8.88468809073724	190	10.5555555555556	4.04255	226.44	58	10.9640831758034	96.08	5.33777777777778	1.65655	145.52	38	7.18336483931947	57.84	3.21333333333333	1.52211	224.32	23	4.34782608695652	57.68	3.20444444444444	2.50783	223.36	24	4.53686200378072	44.48	2.47111111111111	1.85333	58.28	26	4.91493383742911	91	5.05555555555556	3.5	149.4	19	3.59168241965974
Trial 129	90	M	1%	M_1%	1021	12270.8	6.81729	1	1800	100	0	244	23.898139079334	443.28	24.6266666666667	1.81672	1.96	135	13.2223310479922	171.08	9.50444444444445	1.26726	0	139	13.6141038197845	172.08	9.56	1.23799	9.64	60	5.87659157688541	177.44	9.85777777777778	2.95733	429	41	4.01567091087169	92.68	5.14888888888889	2.26049	431.44	28	2.74240940254652	121.8	6.76666666666667	4.35	434.64	13	1.27326150832517
Trial 130	91	M	2%	M_2%	487	7155.1	3.97514	1	1800	100	0	130	26.694045174538	1009.64	56.0911111111111	7.76646	50.52	50	10.2669404517454	85.36	4.74222222222222	1.7072	55.4	72	14.7843942505133	85.52	4.75111111111111	1.18778	95.44	25	5.13347022587269	60.6	3.36666666666667	2.424	94.68	16	3.28542094455852	25.16	1.39777777777778	1.5725	93.72	12	2.46406570841889	27.4	1.52222222222222	2.28333	64.44	1	0.205338809034908
Trial 131	92	M	0%	M_0%	930	11924.9	6.65157	1	1792.96	99.6088888888889	0	76	8.17204301075269	138.44	7.72131001249331	1.82158	102.2	113	12.1505376344086	228.36	12.7364804568981	2.02088	13	62	6.66666666666667	92.16	5.14010351597359	1.48645	8.32	42	4.51612903225806	113.56	6.33366053899697	2.70381	7.04	38	4.08602150537634	102	5.68891665179368	2.68421	2.8	65	6.98924731182796	317.92	17.7315723719436	4.89108	108.76	56	6.02150537634409
Trial 132	93	M	1%	M_1%	789	9598.74	5.33275	1	1800	100	0	124	15.7160963244613	367.68	20.4266666666667	2.96516	400.36	59	7.47782002534854	62.84	3.49111111111111	1.06508	91.64	108	13.6882129277567	158.96	8.83111111111111	1.47185	0	68	8.61850443599493	309.28	17.1822222222222	4.54824	1.6	28	3.54879594423321	60.56	3.36444444444444	2.16286	2.64	40	5.06970849176172	242	13.4444444444444	6.05	7.68	27	3.42205323193916
Trial 133	94	M	2%	M_2%	559	5311.69	2.951	1	1800	100	0	243	43.4704830053667	1202.6	66.8111111111111	4.94897	97.52	11	1.96779964221825	9.96	0.553333333333333	0.905455	94.56	82	14.6690518783542	66.56	3.69777777777778	0.811707	99.48	0	0	0	0	0	1800	0	0	0	0	0	1800	0	0	0	0	0	1800	0	0
Trial 134	95	M	0%	M_0%	825	9778.09	5.43239	1	1800	100	0	75	9.09090909090909	187.32	10.4066666666667	2.4976	48.88	96	11.6363636363636	165.08	9.17111111111111	1.71958	0	50	6.06060606060606	84.32	4.68444444444444	1.6864	149.64	32	3.87878787878788	122.48	6.80444444444444	3.8275	151.6	5	0.606060606060606	28.84	1.60222222222222	5.768	803.44	38	4.60606060606061	165.16	9.17555555555556	4.34632	598.84	132	16
Trial 135	96	M	1%	M_1%	544	7223.52	4.01316	1	1800	100	0	77	14.1544117647059	266.4	14.8	3.45974	0	62	11.3970588235294	74.32	4.12888888888889	1.19871	79.96	82	15.0735294117647	179.24	9.95777777777778	2.18585	92.16	70	12.8676470588235	335.16	18.62	4.788	133.64	43	7.90441176470588	235.92	13.1066666666667	5.48651	306.6	28	5.14705882352941	239.4	13.3	8.55	244.56	14	2.57352941176471
Trial 136	97	M	2%	M_2%	564	5793.6	3.21874	1	1800	100	0	3	0.531914893617021	167.08	9.28222222222222	55.6933	0	42	7.4468085106383	66.52	3.69555555555556	1.58381	168.4	1	0.177304964539007	0.24	0.0133333333333333	0.24	165.76	0	0	0	0	0	1800	34	6.02836879432624	8.2	0.455555555555555	0.241176	913.76	37	6.56028368794326	404.24	22.4577777777778	10.9254	630.88	7	1.24113475177305
Trial 137	98	M	0%	M_0%	1010	13078.6	7.26607	1	1800	100	0	164	16.2376237623762	845.84	46.9911111111111	5.15756	0.2	18	1.78217821782178	4.2	0.233333333333333	0.233333	3.8	41	4.05940594059406	37.44	2.08	0.913171	329.28	24	2.37623762376238	22.56	1.25333333333333	0.94	945.16	30	2.97029702970297	42.36	2.35333333333333	1.412	944.16	111	10.990099009901	349.48	19.4155555555556	3.14847	943.84	194	19.2079207920792
Trial 138	99	M	1%	M_1%	466	5668.52	3.15184	1	1798.64	99.9244444444444	0.56	37	7.93991416309013	477.96	26.5734110216608	12.9178	2.44	36	7.72532188841202	35.2	1.95703420362051	0.977778	12.04	35	7.51072961373391	46.76	2.59974202730952	1.336	1.52	21	4.50643776824034	44.32	2.46408397455856	2.11048	6.44	11	2.36051502145923	27.96	1.55450785037584	2.54182	387.68	21	4.50643776824034	79.72	4.43223769069964	3.79619	295.96	18	3.86266094420601
Trial 139	100	M	2%	M_2%	425	5882.13	3.27564	1	1795.88	99.7711111111111	0	79	18.5882352941176	818.8	45.5932467648172	10.3646	2.72	61	14.3529411764706	136.8	7.61743546339399	2.24262	0	32	7.52941176470588	27.72	1.5435329754772	0.86625	955.4	0	0	0	0	0	1800	0	0	0	0	0	1800	1	0.235294117647059	1.4	0.077956210882687	1.4	521.08	0	0
Trial 140	101	M	0%	M_0%	701	9823.39	5.48866	1	1789.92	99.44	0	200	28.5306704707561	1015.04	56.7086797175293	5.0752	6.28	44	6.27674750356633	17.24	0.963171538392777	0.391818	133.68	48	6.84736091298145	40.12	2.24144095825512	0.835833	0	0	0	0	0	0	1800	0	0	0	0	0	1800	72	10.2710413694722	321.64	17.9695181907571	4.46722	1231.08	98	13.9800285306705
Trial 141	102	M	1%	M_1%	941	11630.6	6.46233	1	1799.92	99.9955555555556	0	245	26.0361317747078	1078.04	59.8937730565803	4.40016	0.2	76	8.07651434643996	54	3.00013333925952	0.710526	24.64	91	9.67056323060574	95.24	5.29134628205698	1.04659	1	34	3.61317747077577	41.12	2.28454597982133	1.20941	8.2	28	2.97555791710946	36.6	2.03342370772034	1.30714	8.56	37	3.93198724760893	121.12	6.72918796390951	3.27351	10.2	23	2.4442082890542
Trial 142	103	M	2%	M_2%	814	9895.86	5.49782	1	1800	100	0	52	6.38820638820639	110.12	6.11777777777778	2.11769	15	31	3.80835380835381	34.2	1.9	1.10323	0.44	268	32.9238329238329	557.36	30.9644444444444	2.0797	16.48	187	22.972972972973	480.88	26.7155555555556	2.57155	27.96	30	3.68550368550369	68.64	3.81333333333333	2.288	98.76	31	3.80835380835381	214.92	11.94	6.9329	9.92	24	2.94840294840295
Trial 143	104	M	0%	M_0%	1295	20593.6	11.4521	1	1798.4	99.9111111111111	0.16	0	0	0	0	0	1800	6	0.463320463320463	5.56	0.309163701067616	0.926667	1185.32	0	0	0	0	0	1800	0	0	0	0	0	1800	0	0	0	0	0	1800	606	46.7953667953668	1370.12	76.1854982206406	2.26092	3.4	606	46.7953667953668
Trial 144	105	M	1%	M_1%	258	5760.18	3.20017	1	1800	100	0	163	63.1782945736434	1543.12	85.7288888888889	9.46699	54.24	49	18.9922480620155	43.2	2.4	0.881633	14.28	2	0.775193798449612	2.92	0.162222222222222	1.46	69.04	0	0	0	0	0	1800	0	0	0	0	0	1800	2	0.775193798449612	7.8	0.433333333333333	3.9	1.36	2	0.775193798449612
Trial 145	106	M	2%	M_2%	1034	10619.6	5.90123	1	1799.72	99.9844444444444	0	112	10.8317214700193	314.4	17.4693841264197	2.80714	62.72	93	8.99419729206963	109.72	6.09650390060676	1.17978	71.24	81	7.83365570599613	80.4	4.4673615895806	0.992593	59.48	5	0.483558994197292	20.8	1.15573533660792	4.16	1375.2	3	0.290135396518375	7.32	0.406729935767786	2.44	1383.88	82	7.93036750483559	324.56	18.0339163869935	3.95805	73.48	84	8.12379110251451
Trial 146	107	M	0%	M_0%	724	7705.97	4.2829	1	1799.4	99.9666666666667	0	124	17.1270718232044	470.2	26.1309325330666	3.79194	466.16	38	5.24861878453039	34.12	1.89618761809492	0.897895	448.44	38	5.24861878453039	33.36	1.8539513171057	0.877895	481.84	8	1.10497237569061	45.6	2.53417805935312	5.7	567.84	1	0.138121546961326	2	0.111148160497944	2	670.8	76	10.4972375690608	294.6	16.3721240413471	3.87632	0.32	104	14.3646408839779
Trial 147	108	M	1%	M_1%	784	10853.2	6.02968	1	1800	100	0	76	9.69387755102041	191.84	10.6577777777778	2.52421	0	104	13.265306122449	340.76	18.9311111111111	3.27654	45.2	49	6.25	68.24	3.79111111111111	1.39265	42.56	35	4.46428571428571	179.08	9.94888888888889	5.11657	49.44	23	2.93367346938776	50.08	2.78222222222222	2.17739	49.88	80	10.2040816326531	351.08	19.5044444444444	4.3885	51.2	107	13.6479591836735
Trial 148	109	M	2%	M_2%	647	7656.56	4.25487	1	1799.64	99.98	0	48	7.41885625965997	372.4	20.6930274943878	7.75833	5.8	47	7.26429675425039	36.24	2.01373608054944	0.771064	1.16	64	9.89180834621329	133.76	7.43259763063724	2.09	6.68	31	4.79134466769706	136.24	7.57040296948279	4.39484	412.08	10	1.54559505409583	31.28	1.73812540285835	3.128	408.92	38	5.87326120556414	260.6	14.4806739125603	6.85789	18.64	45	6.95517774343122
Trial 149	110	M	1%	M_1%	793	8347.61	4.63766	1	1800	100	0	159	20.0504413619168	710	39.4444444444444	4.46541	2.92	106	13.3669609079445	114.92	6.38444444444444	1.08415	10.4	75	9.4577553593947	97.08	5.39333333333333	1.2944	2.44	26	3.27868852459016	105.16	5.84222222222222	4.04462	828.12	17	2.1437578814628	49.72	2.76222222222222	2.92471	826	11	1.38713745271122	14.96	0.831111111111111	1.36	813.56	4	0.504413619167718
Trial 150	111	F	0%	F_0%	614	7751.65	4.30657	1	1800	100	0	118	19.2182410423453	420.32	23.3511111111111	3.56203	102.56	82	13.3550488599349	192.84	10.7133333333333	2.35171	5.08	90	14.6579804560261	126.04	7.00222222222222	1.40044	104.16	44	7.16612377850163	262.08	14.56	5.95636	700.08	8	1.30293159609121	55.16	3.06444444444444	6.895	699.04	31	5.04885993485342	243.44	13.5244444444444	7.8529	458.08	30	4.88599348534202
Trial 151	112	F	1%	F_1%	551	7282.26	4.0466	1	1799.76	99.9866666666667	0	130	23.5934664246824	555.08	30.8418900297818	4.26985	103.44	28	5.08166969147005	75.32	4.18500244477041	2.69	0	136	24.6823956442831	308.84	17.1600657865493	2.27088	104.44	43	7.80399274047187	230.52	12.8083744499267	5.36093	181.48	8	1.4519056261343	31.16	1.73134195670534	3.895	179.28	17	3.08529945553539	112.72	6.26305729652843	6.63059	157.12	11	1.99637023593466
Trial 153	114	F	0%	F_0%	689	8428.33	4.68251	1	1800	100	0	92	13.3526850507983	276.08	15.3377777777778	3.00087	4	100	14.5137880986938	207.36	11.52	2.0736	0	61	8.85341074020319	97.84	5.43555555555556	1.60393	3.52	25	3.62844702467344	84.32	4.68444444444444	3.3728	243.12	22	3.19303338171263	152.64	8.48	6.93818	227.6	35	5.07982583454282	162.4	9.02222222222222	4.64	194	44	6.38606676342525
Trial 154	115	F	1%	F_1%	1490	14476.8	8.04319	1	1800	100	0	371	24.8993288590604	703.48	39.0822222222222	1.89617	19.04	91	6.10738255033557	66.08	3.67111111111111	0.726154	0	202	13.5570469798658	168.52	9.36222222222222	0.834257	58.28	12	0.805369127516778	28.2	1.56666666666667	2.35	59.84	5	0.335570469798658	11.04	0.613333333333333	2.208	1094.68	26	1.74496644295302	102.12	5.67333333333333	3.92769	764.92	11	0.738255033557047
Trial 155	116	F	2%	F_2%	821	9777.45	5.43204	1	1800	100	0	168	20.462850182704	870.28	48.3488888888889	5.18024	118.64	33	4.01948842874543	20.16	1.12	0.610909	0	74	9.01339829476249	110.64	6.14666666666667	1.49514	121.56	44	5.35931790499391	81.28	4.51555555555556	1.84727	647.56	20	2.43605359317905	44.64	2.48	2.232	649.12	23	2.80146163215591	60.32	3.35111111111111	2.62261	654.64	47	5.72472594397077
Trial 156	117	F	0%	F_0%	607	7435.61	4.13098	1	1800	100	0	70	11.5321252059308	188.2	10.4555555555556	2.68857	0	82	13.5090609555189	187.68	10.4266666666667	2.28878	9.6	72	11.8616144975288	189.6	10.5333333333333	2.63333	1.92	47	7.74299835255354	363	20.1666666666667	7.7234	86.56	26	4.2833607907743	118.04	6.55777777777778	4.54	84.16	22	3.62438220757825	186.76	10.3755555555556	8.48909	53.44	18	2.96540362438221
Trial 157	118	F	1%	F_1%	720	10542.3	5.85697	1	1800	100	0	286	39.7222222222222	1442.6	80.1444444444444	5.04406	3.56	38	5.27777777777778	24.8	1.37777777777778	0.652632	0	132	18.3333333333333	81.12	4.50666666666667	0.614545	8.52	13	1.80555555555556	16.88	0.937777777777778	1.29846	37.16	9	1.25	5.64	0.313333333333333	0.626667	257.08	9	1.25	7.28	0.404444444444444	0.808889	255.44	5	0.694444444444444
Trial 158	119	F	2%	F_2%	114	6172.58	3.42929	1	1800	100	0	2	1.75438596491228	0.64	0.0355555555555556	0.32	68.76	2	1.75438596491228	66.84	3.71333333333333	33.42	0	1	0.87719298245614	0.8	0.0444444444444444	0.8	70.2	0	0	0	0	0	1800	0	0	0	0	0	1800	52	45.6140350877193	1700.48	94.4711111111111	32.7015	74.64	53	46.4912280701754
Trial 159	120	F	0%	F_0%	964	13917.7	7.73584	1	1799.28	99.96	0	139	14.4190871369295	465.2	25.854786358988	3.34676	59.96	255	26.4522821576763	496.32	27.5843670801654	1.94635	25.36	66	6.84647302904564	105.24	5.84900626917434	1.59455	54.68	33	3.42323651452282	66.96	3.72148859543817	2.02909	56.64	13	1.34854771784232	29.96	1.6651104886399	2.30462	174.76	55	5.70539419087137	110.88	6.1624649859944	2.016	170.24	69	7.15767634854772
Trial 160	121	F	1%	F_1%	1155	11677.8	6.48781	1	1800	100	0	6	0.519480519480519	36.56	2.03111111111111	6.09333	2.84	244	21.1255411255411	242.48	13.4711111111111	0.99377	0	2	0.173160173160173	0.8	0.0444444444444444	0.4	40.52	0	0	0	0	0	1800	0	0	0	0	0	1800	53	4.58874458874459	428.6	23.8111111111111	8.08679	48.68	63	5.45454545454545
Trial 161	122	F	2%	F_2%	485	7780.92	4.36307	1	1783.52	99.0844444444444	1.6	76	15.6701030927835	472.96	26.5183457432493	6.22316	13.88	81	16.7010309278351	294.2	16.4954696330851	3.6321	3	85	17.5257731958763	159.6	8.94859603480757	1.87765	12.64	61	12.5773195876289	236.4	13.2546873598278	3.87541	11.8	11	2.2680412371134	40.32	2.2606979456356	3.66545	7.92	25	5.15463917525773	149.16	8.36323674531264	5.9664	6.32	17	3.50515463917526
Trial 162	123	F	0%	F_0%	530	7669.1	4.2607	1	1800	100	0	61	11.5094339622642	176.6	9.81111111111111	2.89508	36.44	97	18.3018867924528	315.24	17.5133333333333	3.2499	0.72	69	13.0188679245283	183.6	10.2	2.66087	36.6	46	8.67924528301887	361	20.0555555555556	7.84783	147.32	22	4.15094339622642	118.12	6.56222222222222	5.36909	150.56	33	6.22641509433962	229.44	12.7466666666667	6.95273	106.96	30	5.66037735849057
Trial 163	124	F	1%	F_1%	762	11898.8	6.61058	1	1800	100	0	70	9.18635170603675	205.68	11.4266666666667	2.93829	0.8	169	22.1784776902887	446.4	24.8	2.64142	21.44	67	8.79265091863517	105.8	5.87777777777778	1.5791	2.64	45	5.90551181102362	142.32	7.90666666666667	3.16267	4.24	23	3.01837270341207	71.08	3.94888888888889	3.09043	44.24	65	8.53018372703412	333.8	18.5444444444444	5.13538	35.04	84	11.0236220472441
Trial 164	125	F	2%	F_2%	942	11797	6.55405	1	1800	100	0	80	8.49256900212314	151.08	8.39333333333333	1.8885	708.72	31	3.29087048832272	18.96	1.05333333333333	0.611613	537.72	136	14.4373673036093	143.08	7.94888888888889	1.05206	698.52	84	8.9171974522293	194.16	10.7866666666667	2.31143	697.36	69	7.32484076433121	122.68	6.81555555555556	1.77797	691.52	78	8.28025477707006	355.04	19.7244444444444	4.55179	308.64	63	6.68789808917197
Trial 165	126	F	0%	F_0%	764	10366.3	5.75919	1	1800	100	0	267	34.9476439790576	1342.36	74.5755555555556	5.02757	20.6	16	2.09424083769634	11.28	0.626666666666667	0.705	0	149	19.5026178010471	111.16	6.17555555555556	0.74604	11.48	17	2.22513089005236	40.12	2.22888888888889	2.36	10.44	5	0.654450261780105	8.24	0.457777777777778	1.648	7.8	7	0.916230366492147	3.44	0.191111111111111	0.491429	3.16	5	0.654450261780105
Trial 166	127	F	1%	F_1%	751	11166.8	6.20532	1	1799.72	99.9844444444444	0	102	13.5818908122503	213.88	11.8840708554664	2.09686	248	139	18.508655126498	382.08	21.2299691063054	2.74878	112.56	77	10.2529960053262	163.96	9.11030604760741	2.12935	55.92	48	6.39147802929427	118.08	6.56102060320494	2.46	55	29	3.86151797603196	96.92	5.38528215500189	3.34207	53.32	72	9.58721704394141	295.16	16.4003289400573	4.09944	0.4	76	10.1198402130493
Trial 167	128	F	2%	F_2%	688	9025.63	5.01435	1	1800	100	0	202	29.3604651162791	845.04	46.9466666666667	4.18337	13.64	33	4.79651162790698	31	1.72222222222222	0.939394	0	127	18.4593023255814	212.4	11.8	1.67244	74.8	39	5.66860465116279	115.28	6.40444444444444	2.9559	73.84	9	1.30813953488372	55.08	3.06	6.12	29.68	18	2.61627906976744	125.84	6.99111111111111	6.99111	17.52	18	2.61627906976744
Trial 168	129	F	0%	F_0%	612	8152.9	4.53302	1	1798.72	99.9288888888889	0	299	48.8562091503268	1081.04	60.1005159224337	3.61552	137.2	9	1.47058823529412	6.72	0.37359900373599	0.746667	71.16	77	12.5816993464052	38.2	2.12373243195161	0.496104	90	13	2.12418300653595	20.08	1.11634940402064	1.54462	88.76	20	3.26797385620915	23.32	1.29647749510763	1.166	86.96	28	4.57516339869281	39.4	2.19044653976161	1.40714	2.32	26	4.2483660130719
Trial 169	130	F	1%	F_1%	822	9507.51	5.28207	1	1800	100	0	34	4.13625304136253	42.64	2.36888888888889	1.25412	0	61	7.42092457420925	74	4.11111111111111	1.21311	131.44	59	7.17761557177616	119.32	6.62888888888889	2.02237	2.84	43	5.23114355231144	213.44	11.8577777777778	4.96372	6.12	26	3.16301703163017	75.64	4.20222222222222	2.90923	8.2	57	6.93430656934307	256.12	14.2288888888889	4.49333	11.24	47	5.71776155717762
Trial 170	131	F	2%	F_2%	732	9302.03	5.16791	1	1800	100	0	147	20.0819672131148	384.64	21.3688888888889	2.6166	9.64	119	16.2568306010929	233.52	12.9733333333333	1.96235	0	125	17.0765027322404	235.16	13.0644444444444	1.88128	12.12	59	8.06010928961749	393.4	21.8555555555556	6.6678	200.32	23	3.14207650273224	73.64	4.09111111111111	3.20174	203.84	24	3.27868852459016	59.6	3.31111111111111	2.48333	205.76	20	2.73224043715847
Trial 171	132	F	0%	F_0%	917	12229.3	6.7942	1	1800	100	0	55	5.99781897491821	67.76	3.76444444444444	1.232	121.76	103	11.2322791712105	278.56	15.4755555555556	2.70447	0	68	7.4154852780807	102.68	5.70444444444444	1.51	111.84	51	5.56161395856052	104.08	5.78222222222222	2.04078	110.96	37	4.03489640130862	87.84	4.88	2.37405	109.52	116	12.649945474373	487.12	27.0622222222222	4.19931	10.2	139	15.1581243184297
Trial 172	133	F	1%	F_1%	1077	11509.1	6.39453	1	1799.88	99.9933333333333	0.12	131	12.1634168987929	246.04	13.6698002089028	1.87817	3.8	78	7.24233983286908	109.12	6.06262639731538	1.39897	157.72	139	12.9062209842154	215.84	11.9919105718159	1.55281	1.76	71	6.59238625812442	233.68	12.9830877614063	3.29127	647.92	21	1.94986072423398	41.72	2.31793230659822	1.98667	646	74	6.87093779015785	241	13.3897815409916	3.25676	287.76	78	7.24233983286908
Trial 173	134	F	2%	F_2%	1151	12191.9	6.77359	1	1800	100	0	172	14.9435273675065	309.48	17.1933333333333	1.7993	285.88	180	15.6385751520417	268.72	14.9288888888889	1.49289	0	81	7.03735881841877	100.24	5.56888888888889	1.23753	313.08	29	2.51954821894005	84.16	4.67555555555556	2.90207	612.92	25	2.17202432667246	49.56	2.75333333333333	1.9824	610.52	47	4.08340573414422	124.12	6.89555555555556	2.64085	523.6	52	4.51781059947871
[truncated: 33 more columns]

## Sheet: metadata
Column name	Colname_Laura	Type of variable: manual variable (manual), original Ethovision variable (EthV) or derived from other variables (derived)?	Ethovision variable name	Explanation (calculation)		Zones
ID_nr	ID_nr	manual		individual ID		Start	Start zone, where the fish is released into the aquarium
Sex	Sex	manual		sex; M=male F=female		DCR	Dark corner roof, a sheltered area
EtOH_dose	EtOH_dose	manual		v/v % ethanol, immersion treatment for 30 minutes		CORR1	Corridor 1
Group	Group	manual		Sex and Dose		CORN	Corner
Total_act	Total_act	derived		sum of frequencies per zone (excl. cumulative zones)		CORR2	Corridor 2
Arena_dx	arena_dx	EthV	Distance moved Center-point Total inch	distance moved in the whole arena in cm		RAMP1	Ramp 1 (deepest part of the ramp)
Arena_v	arena_v	EthV	Velocity Center-point Mean inch/s	velocity (cm/s)		RAMP2	Ramp 2
Arena_freq	arena_freq	EthV	In zone Arena / Center-point Frequency	number of entries into the whole arena		RAMP3	Ramp 3
Arena_dur	arena_dur	EthV	In zone Arena / Center-point Cumulative Duration s	duration in the whole arena		RAMP4	Ramp 4 (shallowest part of the ramp)
Arena_durperc	arena_durperc	derived		arena_dur/1800 (MCSF lasted 30 mins = 1800 sec)		CENT	Center
Arena_lat	arena_lat	EthV	In zone Arena / Center-point Latency to First s	latency to entry into the arena (any zone)		CIRC	Circle
DCR_freq	DCR_freq	EthV	In zone DCR / Center-point Frequency	number of entries into DCR zone		REST	the part of the arena not designated to any other zone
DCR_freqperc	DCR_freq%	derived		100*DCR_freq / Total_act
DCR_dur	DCR_dur	EthV	In zone DCR / Center-point Cumulative Duration s	duration in zone DCR in seconds
DCR_durperc	DCR_durperc	derived		100*DCR_dur / arena_dur
DCR_durfreq	DCR_durfreq	derived		DCR_dur / DCR_freq = average visit duration
DCR_lat	DCR_lat	EthV	In zone DCR / Center-point Latency to First s	Latency to first entry into the DCR
Start_freq	Start_freq	EthV	In zone Start / Center-point Frequency	number of entries into START zone
Start_freqperc		derived		100*START_freq / Total_act
Start_dur	Start_dur	EthV	In zone Start / Center-point Cumulative Duration s	duration in zone START in seconds
Start_durperc		derived		100*START_dur / arena_dur
Start_durfreq		derived		START_dur / START_freq = average visit duration
Start_lat	Start_lat	EthV	In zone Start / Center-point Latency to First s	Latency to first entry into the START
Corr1_freq	Corr1_freq	EthV	In zone Corr1 / Center-point Frequency	number of entries into CORR1 zone
Corr1_freqperc		derived		100*CORR1_freq / Total_act
Corr1_dur	Corr1_dur	EthV	In zone Corr1 / Center-point Cumulative Duration s	duration in zone CORR1 in seconds
Corr1_durperc		derived		100*CORR1_dur / arena_dur
Corr1_durfreq		derived		CORR1_dur / CORR1_freq = average visit duration
Corr1_lat	Corr1_lat	EthV	In zone Corr1 / Center-point Latency to First s	Latency to first entry into the CORR1
Corn_freq	Corn_freq	EthV	In zone Corner / Center-point Frequency	number of entries into CORN zone
Corn_freqperc		derived		100*CORN_freq / Total_act
Corn_dur	Corn_dur	EthV	In zone Corner / Center-point Cumulative Duration s	duration in zone CORN in seconds
Corn_durperc		derived		100*CORN_dur / arena_dur
Corn_durfreq		derived		CORN_dur / CORN_freq = average visit duration
Corn_lat	Corn_lat	EthV	In zone Corner / Center-point Latency to First s	Latency to first entry into the CORN
Corr2_freq	Corr2_freq	EthV	In zone Corr2 / Center-point Frequency	number of entries into CORR2 zone
Corr2_freqperc				100*CORR2_freq / Total_act
Corr2_dur	Corr2_dur	EthV	In zone Corr2 / Center-point Cumulative Duration s	duration in zone CORR2 in seconds
Corr2_durperc				100*CORR2_dur / arena_dur
Corr2_durfreq				CORR2_dur / CORR2_freq = average visit duration
Corr2_lat	Corr2_lat	EthV	In zone Corr2 / Center-point Latency to First s	Latency to first entry into the CORR2
Ramp1_freq	Ramp1_freq	EthV	In zone Ramp1 / Center-point Frequency	number of entries into RAMP1 zone
Ramp1_freqperc				100*RAMP1_freq / Total_act
Ramp1_dur	Ramp1_dur	EthV	In zone Ramp1 / Center-point Cumulative Duration s	duration in zone RAMP1 in seconds
Ramp1_durperc				100*RAMP1_dur / arena_dur
Ramp1_durfreq				RAMP1_dur / RAMP1_freq = average visit duration
Ramp1_lat	Ramp1_lat	EthV	In zone Ramp1 / Center-point Latency to First s	Latency to first entry into the RAMP1
Ramp2_freq	Ramp2_freq	EthV	In zone Ramp2 / Center-point Frequency	number of entries into RAMP2 zone
Ramp2_freqperc				100*RAMP2_freq / Total_act
Ramp2_dur	Ramp2_dur	EthV	In zone Ramp2 / Center-point Cumulative Duration s	duration in zone RAMP2 in seconds
Ramp2_durperc				100*RAMP2_dur / arena_dur
Ramp2_durfreq				RAMP2_dur / RAMP2_freq = average visit duration
Ramp2_lat	Ramp2_lat	EthV	In zone Ramp2 / Center-point Latency to First s	Latency to first entry into the RAMP2
Ramp3_freq	Ramp3_freq	EthV	In zone Ramp3 / Center-point Frequency	number of entries into RAMP3 zone
Ramp3_freqperc				100*RAMP3_freq / Total_act
Ramp3_dur	Ramp3_dur	EthV	In zone Ramp3 / Center-point Cumulative Duration s	duration in zone RAMP3 in seconds
Ramp3_durperc				100*RAMP3_dur / arena_dur
Ramp3_durfreq				RAMP3_dur / RAMP3_freq = average visit duration
Ramp3_lat	Ramp3_lat	EthV	In zone Ramp3 / Center-point Latency to First s	Latency to first entry into the RAMP3
Ramp4_freq	Ramp4_freq	EthV	In zone Ramp4 / Center-point Frequency	number of entries into RAMP4 zone
Ramp4_freqperc				100*RAMP4_freq / Total_act
Ramp4_dur	Ramp4_dur	EthV	In zone Ramp4 / Center-point Cumulative Duration s	duration in zone RAMP4 in seconds
Ramp4_durperc				100*RAMP4_dur / arena_dur
Ramp4_durfreq				RAMP4_dur / RAMP4_freq = average visit duration
Ramp4_lat	Ramp4_lat	EthV	In zone Ramp4 / Center-point Latency to First s	Latency to first entry into the RAMP4
Circ_freq	Circ_freq	EthV	In zone Ctcrl / Center-point Frequency	number of entries into CIRC zone
Circ_freqperc				100*CIRC_freq / Total_act
Circ_dur	Circ_dur	EthV	In zone Ctcrl / Center-point Cumulative Duration s	duration in zone CIRC in seconds
Circ_durperc				100*CIRC_dur / arena_dur
Circ_durfreq				CIRC_dur / CIRC_freq = average visit duration
Circ_lat	Circ_lat	EthV	In zone Ctcrl / Center-point Latency to First s	Latency to first entry into the CIRC
Cent_freq	Cent_freq	EthV	In zone Center / Center-point Frequency	number of entries into CENT zone
Cent_freqperc				100*CENT_freq / Total_act
Cent_dur	Cent_dur	EthV	In zone Center / Center-point Cumulative Duration s	duration in zone CENT in seconds
Cent_durperc				100*CENT_dur / arena_dur
Cent_durfreq				CENT_dur / CENT_freq = average visit duration
Cent_lat	Cent_lat	EthV	In zone Center / Center-point Latency to First s	Latency to first entry into the CENT
Rest_dur		derived		duration in zone REST in seconds
Rest_durperc		derived		100*REST_dur / arena_dur
Zones_explored	Zones_explored	derived		Number of zones that the fish entered
Fully_explored	Fully_explored	derived		If all zones were entered, yes or no
Zone_homebase	Zone_homebase	derived		Zone that was visited for the longest duration.
